# Supplementary material for: Substrate-mediated growth of vanadium carbide with controllable structure as high performance electrocatalysts for dye-sensitized solar cells
Source: Royal Society of Chemistry journal article supplement (doi:10.1039/c7ra00547d), 2017-01-01
Supplement: c7ra00547d1.pdf [file c7ra00547d1.pdf]

**Supporting Information for**

**Substrate-Mediated Growth of Vanadium  
Carbide with Controllable Structure as High  
Performance Electrocatalysts for Dye-  
Sensitized Solar Cells**

*Jutao Jin,<sup>1</sup> Zhiyang Wei,<sup>2</sup> Xiaochang Qiao, Hongbo Fan,<sup>1\*</sup> and Lifeng Cui<sup>1\*</sup>*

1: Dongguan University of Technology, School of Environment and Civil Engineering

2: Insititute of Physics, Chinese Academy of Sciences

**KEYWORDS:** Vanadium carbide; crystal structure; triiodide reduction reaction; dye-sensitized solar cells.

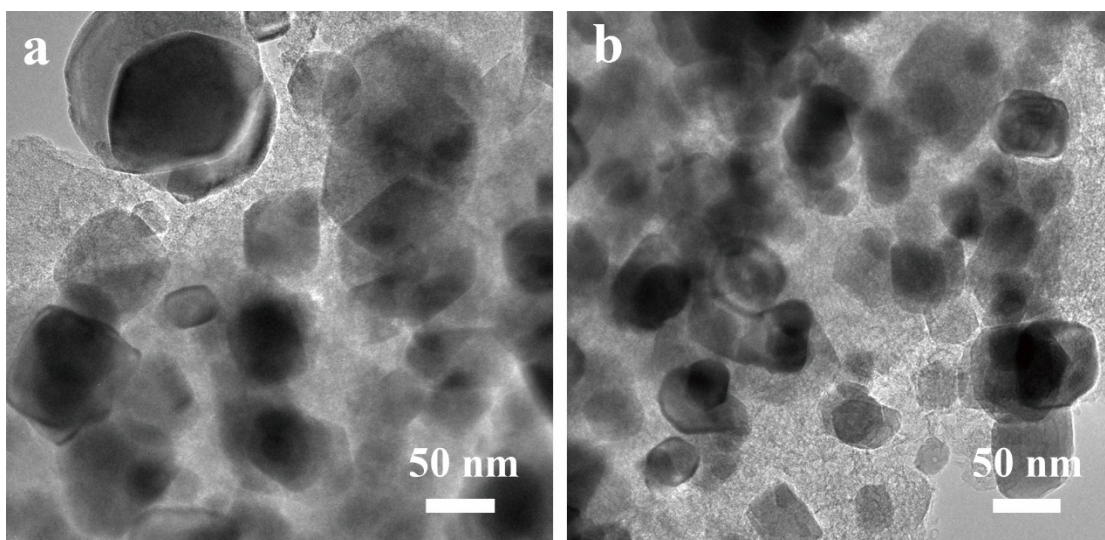

**Figure S1.** VC nanoparticles synthesis by different cyanamide to V atomic ratio: (a) 8, named as VC8, and (b) 12, named as VC12.

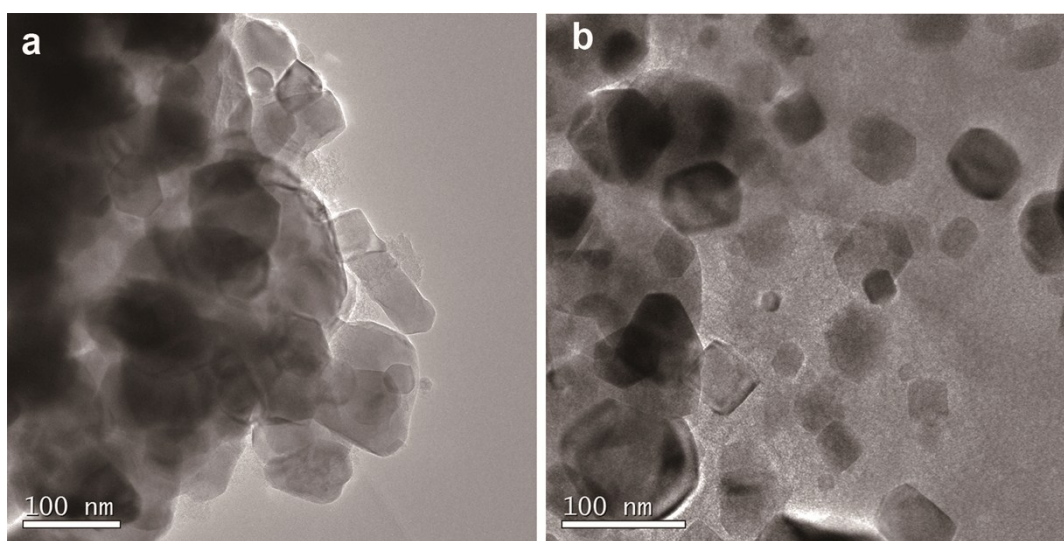

**Figure S2.** VC-GS synthesized with different ratio of VOCl<sub>3</sub> to GO (a) 5 mmol VOCl<sub>3</sub> with 100 mg GO precursor (b) 0.5 mmol VOCl<sub>3</sub> with 100 mg GO precursor

**Table s1. The electronic conductivity of various samples measured with four-probe technology**

| Sample   | $\rho_s$ ( $\Omega$ *cm) |
|----------|--------------------------|
| VC-ch/GS | 0.09                     |
| VC-cb/GS | 0.08                     |
| VC8      | 0.10                     |
| VC12     | 0.09                     |

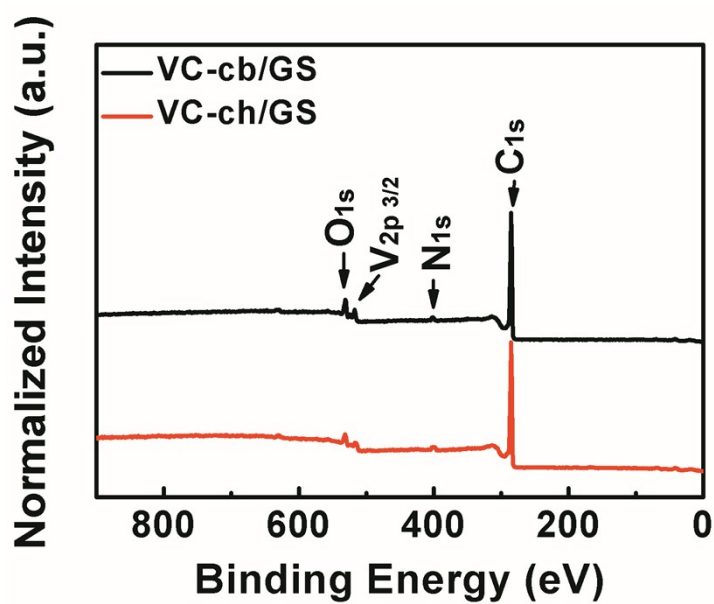

**Figure S3.** XPS spectrum of VC-ch/RGO hybrid and VC-cb/RGO hybrid.

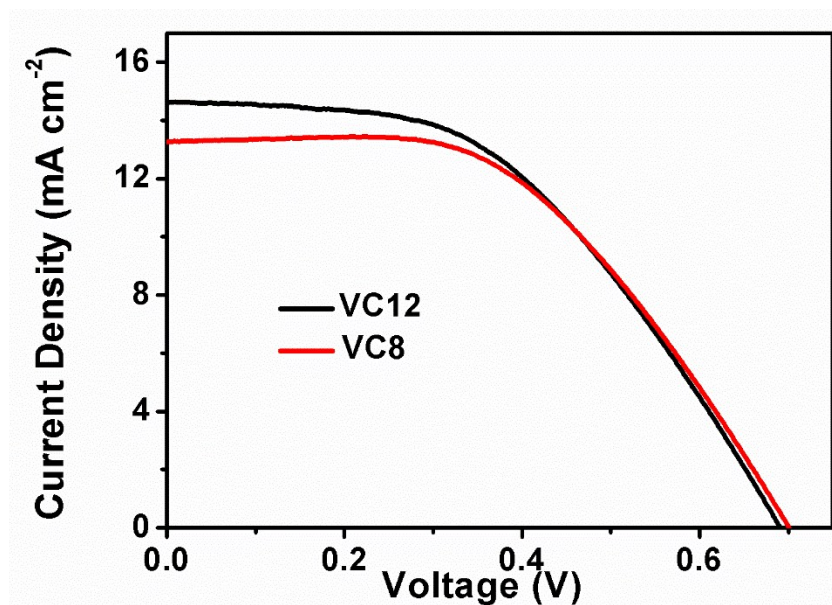

**Figure S4.** Photocurrent density-voltage curves of DSSCs with the VC8 and VC12 CEs, measured under standard AM 1.5 G illumination (100mWcm<sup>-2</sup>)

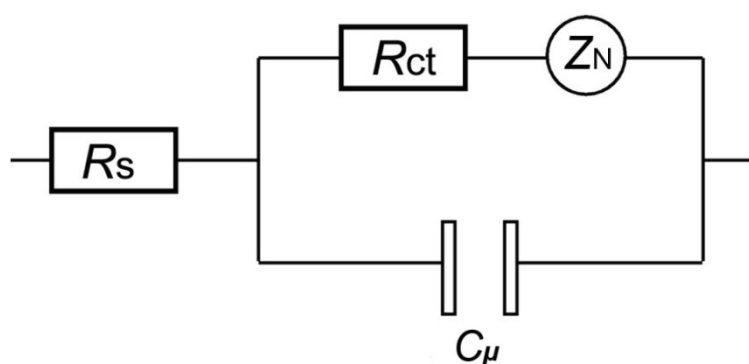

**Figure S5.** Equivalent circuit of the symmetric dummy cells used in EIS measurement.

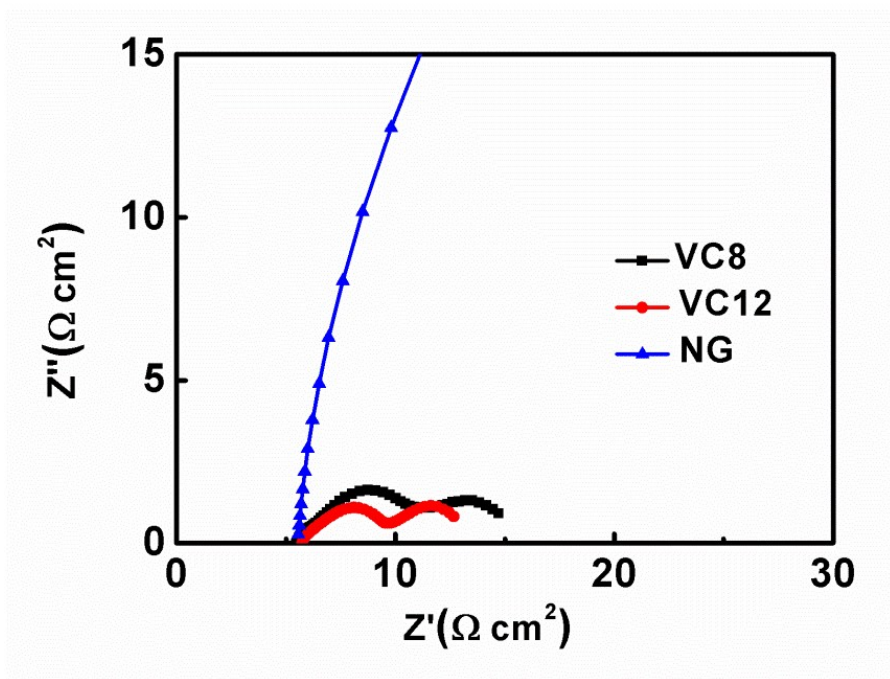

**Figure S6.** Nyquist plot of the symmetric dummy cells fabricated by VC8, VC12, and N-doped graphene counter electrodes (CEs).

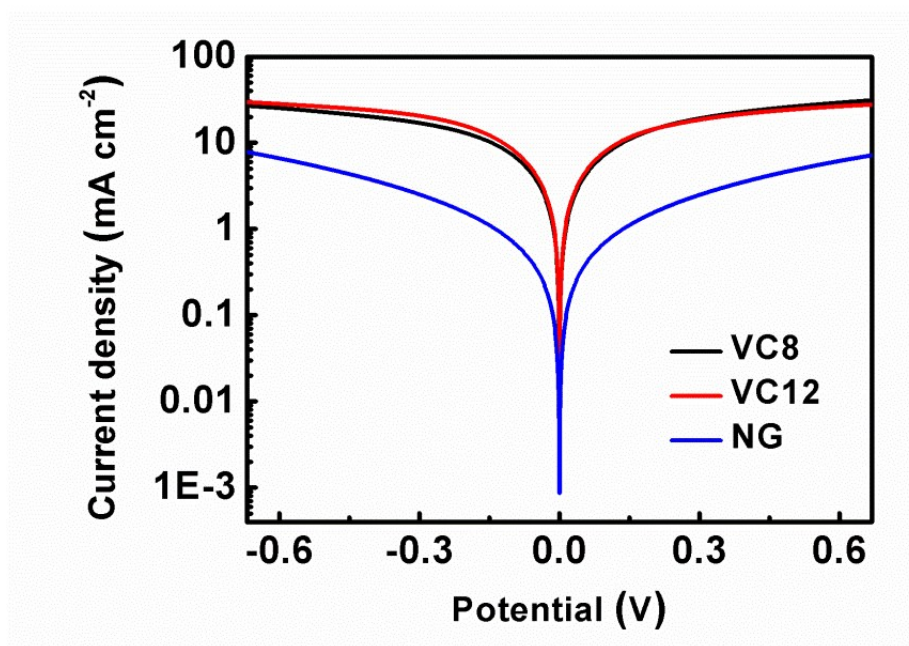

**Figure S7.** Tafel polarization curves of the symmetric dummy cells with VC8, VC12, and N-doped graphene counter electrodes (CEs).
